# Supplementary material for: Neural network radiative transfer for imaging spectroscopy
Source: Copernicus journal article supplement (doi:10.5194/amt-12-2567-2019), 2019-05-02
Supplement: Supplementary file 1 [file amt-12-2567-2019-supplement.zip]

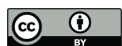

## *Supplement of*

# **Neural network radiative transfer for imaging spectroscopy**

**Brian D. Bue et al.**

*Correspondence to:* Brian D. Bue ([bbue@jpl.nasa.gov](mailto:bbue@jpl.nasa.gov))

- [amt-12-2567-2019-supplement-title-page.pdf](#)
- [prm20151026t173148\\_libradtran\\_config](#)

The copyright of individual parts of the supplement might differ from the CC BY 4.0 License.
